# Supplementary material for: Comprehensive Analysis of a Long Noncoding RNA-Associated Competing Endogenous RNA Network in Wilms Tumor
Source: PubMed Central journal article supplement — Cancer Control. 2020 Jun 29;27(2):1073274820936991. doi: 10.1177/1073274820936991 (PMC7324900; doi:10.1177/1073274820936991), 2020-06-29
Supplement: supplemental_material_(2).pdf [file supplemental_material_%282%29.pdf]

**Table S1 The top 15 up-regulated and 15 down-regulated DEmRNAs in Wilms' tumor samples**

| DEmRNAs   | Top 15 up-regulated mRNAs |       |           | DEmRNAs | Top 15 down-regulated mRNAs |        |          |
|-----------|---------------------------|-------|-----------|---------|-----------------------------|--------|----------|
|           | Ensembl ID                | logFC | FDR       |         | Ensembl ID                  | logFC  | FDR      |
| EYA1      | ENSG00000104313           | 9.10  | 4.45E-163 | SLC4A1  | ENSG00000004939             | -9.09  | 4.52E-79 |
| COL2A1    | ENSG00000139219           | 10.57 | 4.45E-163 | MFS4    | ENSG00000174514             | -6.62  | 1.37E-58 |
| SOX11     | ENSG00000176887           | 8.22  | 3.52E-158 | ANXA9   | ENSG00000143412             | -4.15  | 1.87E-58 |
| SIX2      | ENSG00000170577           | 12.51 | 3.64E-141 | GCNT3   | ENSG00000140297             | -7.56  | 2.22E-57 |
| SIX1      | ENSG00000126778           | 8.86  | 1.37E-126 | AQP2    | ENSG00000167580             | -13.93 | 1.60E-56 |
| NUSAP1    | ENSG00000137804           | 4.84  | 4.18E-108 | ZNF44   | ENSG00000197857             | -3.02  | 6.20E-55 |
| TOP2A     | ENSG00000131747           | 5.51  | 1.15E-104 | FAM167B | ENSG00000183615             | -4.49  | 8.59E-55 |
| ELOVL2    | ENSG00000197977           | 7.86  | 1.20E-104 | CLCNKA  | ENSG00000186510             | -10.27 | 3.25E-54 |
| ST8SIA2   | ENSG00000140557           | 8.52  | 9.68E-98  | RCAN1   | ENSG00000159200             | -3.97  | 7.69E-52 |
| MEOX1     | ENSG00000005102           | 8.77  | 1.29E-96  | NOSTRIN | ENSG00000163072             | -3.22  | 2.32E-50 |
| APBA2     | ENSG00000034053           | 4.76  | 5.51E-95  | SLC4A9  | ENSG00000113073             | -6.87  | 2.98E-50 |
| NCAPG     | ENSG00000109805           | 5.11  | 9.19E-90  | ELMO3   | ENSG00000102890             | -4.74  | 5.46E-50 |
| KIF15     | ENSG00000163808           | 5.41  | 1.99E-88  | PTGER1  | ENSG00000160951             | -7.35  | 6.11E-50 |
| ARHGAP11A | ENSG00000198826           | 4.47  | 5.69E-88  | RASD1   | ENSG00000108551             | -7.54  | 1.19E-49 |
| NKAIN1    | ENSG00000084628           | 8.54  | 6.10E-88  | AVPR2   | ENSG00000126895             | -7.43  | 2.44E-48 |

**Table S2 The top 15 up-regulated and 15 down-regulated DElncRNAs in Wilms' tumor samples**

| DElncRNAs      | Top 15 up-regulated lncRNAs |       |          | Top 15 down-regulated lncRNAs |                 |        |          |
|----------------|-----------------------------|-------|----------|-------------------------------|-----------------|--------|----------|
|                | Ensembl ID                  | logFC | FDR      | DElncRNAs                     | Ensembl ID      | logFC  | FDR      |
| UG0898H09      | ENSG00000274956             | 9.27  | 1.40E-87 | RP13-452N2.1                  | ENSG00000242048 | -11.33 | 4.07E-68 |
| IGF2-AS        | ENSG00000099869             | 6.93  | 4.25E-55 | PP7080                        | ENSG00000188242 | -3.43  | 4.25E-68 |
| RP11-1102P16.1 | ENSG00000253379             | 5.10  | 1.26E-52 | RP11-317M11.1                 | ENSG00000249341 | -8.79  | 1.26E-52 |
| CTD-2147F2.1   | ENSG00000259485             | 6.87  | 3.79E-41 | LINC00675                     | ENSG00000263429 | -9.17  | 7.10E-43 |
| SLC16A1-AS1    | ENSG00000226419             | 3.05  | 1.32E-40 | RP11-728F11.4                 | ENSG00000254528 | -4.01  | 1.16E-39 |
| HAS2-AS1       | ENSG00000248690             | 5.11  | 4.75E-35 | RP11-61L19.2                  | ENSG00000273335 | -7.20  | 1.56E-36 |
| GDNF-AS1       | ENSG00000248587             | 5.39  | 6.38E-34 | LINC01543                     | ENSG00000263862 | -7.30  | 2.51E-36 |
| WT1-AS         | ENSG00000183242             | 4.88  | 3.46E-31 | LA16c-329F2.1                 | ENSG00000261399 | -6.03  | 7.53E-36 |
| RP11-159H10.3  | ENSG00000246528             | 6.74  | 7.84E-31 | RP3-395M20.8                  | ENSG00000238164 | -4.78  | 1.20E-35 |
| RP11-244M2.1   | ENSG00000267374             | 6.80  | 6.23E-30 | FLJ31356                      | ENSG00000229951 | -4.77  | 2.49E-34 |
| RP11-629G13.1  | ENSG00000247416             | 4.75  | 1.61E-29 | LINC00671                     | ENSG00000213373 | -5.86  | 3.76E-30 |
| FZD10-AS1      | ENSG00000250208             | 3.99  | 8.43E-29 | RP11-352D13.5                 | ENSG00000259504 | -6.14  | 1.87E-28 |
| AP000662.4     | ENSG00000254602             | 4.89  | 3.49E-28 | RP11-933H2.4                  | ENSG00000250608 | -3.60  | 4.76E-27 |
| ZIM2-AS1       | ENSG00000269793             | 4.12  | 3.49E-28 | RP11-573D15.8                 | ENSG00000197099 | -5.49  | 1.29E-26 |
| LINC00327      | ENSG00000232977             | 4.24  | 5.80E-28 | RP11-47I22.2                  | ENSG00000250548 | -5.11  | 1.14E-25 |

**Table S3 The top 15 up-regulated and 15 down-regulated DEmiRNAs in Wilms' tumor samples**

| Top 15 up-regulated miRNAs |       |          | Top 15 down-regulated miRNAs |       |          |
|----------------------------|-------|----------|------------------------------|-------|----------|
| DEmiRNAs                   | logFC | FDR      | DEmiRNAs                     | logFC | FDR      |
| hsa-mir-483                | 6.24  | 1.28E-32 | hsa-mir-29c                  | -4.27 | 1.12E-24 |
| hsa-mir-130b               | 4.81  | 2.10E-26 | hsa-mir-190a                 | -2.55 | 2.67E-20 |
| hsa-mir-301b               | 6.34  | 1.20E-21 | hsa-mir-23a                  | -2.41 | 2.69E-16 |
| hsa-mir-301a               | 3.12  | 1.21E-21 | hsa-mir-22                   | -3.02 | 2.87E-14 |
| hsa-mir-218-1              | 3.61  | 1.11E-20 | hsa-mir-30a                  | -4.01 | 1.88E-13 |
| hsa-mir-218-2              | 3.64  | 1.11E-20 | hsa-mir-30b                  | -2.52 | 2.45E-13 |
| hsa-mir-93                 | 3.08  | 1.47E-20 | hsa-mir-29a                  | -4.10 | 4.37E-13 |
| hsa-mir-18a                | 3.60  | 2.76E-15 | hsa-mir-29b-1                | -3.39 | 6.04E-13 |
| hsa-mir-149                | 3.18  | 9.31E-15 | hsa-mir-27a                  | -2.45 | 5.70E-12 |
| hsa-mir-335                | 3.26  | 2.90E-14 | hsa-mir-29b-2                | -2.87 | 2.45E-11 |
| hsa-mir-182                | 3.71  | 6.83E-14 | hsa-mir-203a                 | -5.50 | 3.87E-10 |
| hsa-mir-183                | 3.87  | 7.41E-14 | hsa-mir-139                  | -2.72 | 7.64E-10 |
| hsa-mir-20a                | 2.23  | 2.52E-13 | hsa-mir-194-1                | -2.02 | 7.43E-09 |
| hsa-mir-342                | 2.64  | 2.52E-13 | hsa-mir-192                  | -2.12 | 9.86E-08 |
| hsa-mir-383                | 9.42  | 2.52E-13 | hsa-mir-193a                 | -2.27 | 9.86E-08 |

**Table S4 The top 10 DElncRNAs targeted by most DEMiRNAs in the ceRNA network**

| DElncRNAs      | DEmiRNAs                                                                                                                                                                                                                                                                                                                                                       |
|----------------|----------------------------------------------------------------------------------------------------------------------------------------------------------------------------------------------------------------------------------------------------------------------------------------------------------------------------------------------------------------|
| FAM225B        | hsa-mir-23a, hsa-mir-30a, hsa-mir-30b, hsa-mir-204, hsa-mir-25, hsa-mir-301a, hsa-mir-301b, hsa-mir-454, hsa-mir-27a, hsa-mir-503, hsa-mir-29a, hsa-mir-29c, hsa-mir-150, hsa-mir-93, hsa-mir-17, hsa-mir-206, hsa-mir-20a, hsa-mir-195, hsa-mir-497, hsa-mir-135b, hsa-mir-196b, hsa-mir-200a                                                                 |
| RP11-398K22.12 | hsa-mir-29a, hsa-mir-29c, hsa-mir-22, hsa-mir-30a, hsa-mir-30b, hsa-mir-17, hsa-mir-20a, hsa-mir-93, hsa-mir-150, hsa-mir-33a, hsa-mir-200a, hsa-mir-503, hsa-mir-195, hsa-mir-497, hsa-mir-196b, hsa-mir-206, hsa-mir-301a, hsa-mir-301b, hsa-mir-454, hsa-mir-187                                                                                            |
| AC011747.4     | hsa-mir-195, hsa-mir-497, hsa-mir-301a, hsa-mir-301b, hsa-mir-454, hsa-mir-33a, hsa-mir-22, hsa-mir-29a, hsa-mir-29c, hsa-mir-182, hsa-mir-135b, hsa-mir-25, hsa-mir-18a, hsa-mir-503, hsa-mir-150, hsa-mir-93, hsa-mir-190a, hsa-mir-17, hsa-mir-20a, hsa-mir-23a, hsa-mir-133b, hsa-mir-30a, hsa-mir-30b, hsa-mir-206, hsa-mir-27a                           |
| AC018890.6     | hsa-mir-33a, hsa-mir-133b, hsa-mir-96, hsa-mir-200b, hsa-mir-429, hsa-mir-196b, hsa-mir-17, hsa-mir-20a, hsa-mir-93, hsa-mir-150, hsa-mir-204, hsa-mir-182, hsa-mir-27a, hsa-mir-21, hsa-mir-22, hsa-mir-29a, hsa-mir-29c, hsa-mir-301a, hsa-mir-301b, hsa-mir-454, hsa-mir-23a                                                                                |
| AC093627.10    | hsa-mir-195, hsa-mir-497, hsa-mir-150, hsa-mir-135b, hsa-mir-21, hsa-mir-190a, hsa-mir-200a, hsa-mir-30a, hsa-mir-30b, hsa-mir-25, hsa-mir-33a, hsa-mir-27a, hsa-mir-133b, hsa-mir-29a, hsa-mir-29c, hsa-mir-22, hsa-mir-200b, hsa-mir-429, hsa-mir-23a, hsa-mir-301a, hsa-mir-301b, hsa-mir-454, hsa-mir-503                                                  |
| STARD4-AS1     | hsa-mir-204, hsa-mir-29a, hsa-mir-29c, hsa-mir-21, hsa-mir-133b, hsa-mir-150, hsa-mir-33a, hsa-mir-23a, hsa-mir-22, hsa-mir-195, hsa-mir-497, hsa-mir-96, hsa-mir-187, hsa-mir-17, hsa-mir-20a, hsa-mir-93, hsa-mir-206, hsa-mir-18a                                                                                                                           |
| RP11-933H2.4   | hsa-mir-204, hsa-mir-23a, hsa-mir-196b, hsa-mir-503, hsa-mir-27a, hsa-mir-200a, hsa-mir-195, hsa-mir-497, hsa-mir-200b, hsa-mir-429, hsa-mir-25, hsa-mir-301a, hsa-mir-301b, hsa-mir-454, hsa-mir-17, hsa-mir-20a, hsa-mir-93, hsa-mir-18a, hsa-mir-206                                                                                                        |
| CTD-233717.1   | hsa-mir-204, hsa-mir-195, hsa-mir-497, hsa-mir-22, hsa-mir-27a, hsa-mir-17, hsa-mir-20a, hsa-mir-93, hsa-mir-29a, hsa-mir-29c, hsa-mir-33a, hsa-mir-503, hsa-mir-182, hsa-mir-23a, hsa-mir-150, hsa-mir-200b, hsa-mir-429, hsa-mir-301a, hsa-mir-301b, hsa-mir-454, hsa-mir-96, hsa-mir-135b                                                                   |
| AP000997.2     | hsa-mir-204, hsa-mir-150, hsa-mir-200a, hsa-mir-21, hsa-mir-200b, hsa-mir-429, hsa-mir-196b, hsa-mir-206, hsa-mir-96, hsa-mir-25, hsa-mir-93, hsa-mir-27a, hsa-mir-22, hsa-mir-33a, hsa-mir-195, hsa-mir-497, hsa-mir-190a, hsa-mir-182, hsa-mir-135b, hsa-mir-17, hsa-mir-503, hsa-mir-20a, hsa-mir-18a, hsa-mir-301a, hsa-mir-301b, hsa-mir-454,             |
| RP11-438B23.2  | hsa-mir-21, hsa-mir-204, hsa-mir-200a, hsa-mir-503, hsa-mir-133b, hsa-mir-135b, hsa-mir-190a, hsa-mir-200b, hsa-mir-429, hsa-mir-150, hsa-mir-206, hsa-mir-33a, hsa-mir-23a, hsa-mir-25, hsa-mir-182, hsa-mir-196b, hsa-mir-22, hsa-mir-30a, hsa-mir-30b, hsa-mir-29a, hsa-mir-29c, hsa-mir-18a, hsa-mir-17, hsa-mir-20a, hsa-mir-93, hsa-mir-195, hsa-mir-497 |

The 759 DElncRNAs and 39 DEMiRNAs were paired according to the miRcode database. The top 10 differently expressed lncRNAs targeted by most differently expressed miRNAs in the ceRNA network were showed.

**Table S5 All the 33 DEmiRNAs with their target DEmRNAs in the ceRNA network**

| DEmiRNAs     | DEmRNAs                                                                                                                                                                                                                                                                               |
|--------------|---------------------------------------------------------------------------------------------------------------------------------------------------------------------------------------------------------------------------------------------------------------------------------------|
| hsa-mir-133b | FOXL2, SGK1                                                                                                                                                                                                                                                                           |
| hsa-mir-135b | KLF4, LZTS1, ARC                                                                                                                                                                                                                                                                      |
| hsa-mir-150  | MYB, EGR2                                                                                                                                                                                                                                                                             |
| hsa-mir-17   | E2F1, ENPP5, PLS1, ITGB8, ZBTB4, STAT3, SMOC1, PARD6B, RRM2, TXNIP, KPNA2, CHAF1A, ANKRD33B, SALL3, PRRG1, ETV1, TBC1D2, CEP170, ATAD2, NETO2, FOXQ1, HMGB3, DUSP2, NACC2, KIF23, ELAVL2, SAMD12, ZBTB7A, HAS2, ZNF280B, SACS, POLQ, FAM102A, E2F2, DENND5B, ARAP2, NTN4, EGR2        |
| hsa-mir-182  | MITF, FGF9, THBS1, PLEKHA8, PCDH8                                                                                                                                                                                                                                                     |
| hsa-mir-187  | BCL6                                                                                                                                                                                                                                                                                  |
| hsa-mir-18a  | IGF2BP2, HSF2, PARD6B, CRIM1                                                                                                                                                                                                                                                          |
| hsa-mir-190a | KCNQ5                                                                                                                                                                                                                                                                                 |
| hsa-mir-195  | CCNE1, WNT7A, MYB, CEP55, BTG2, MAFK, CPEB2, PSAT1, HSPE1-MOB4, TLE4, CHEK1, CBX2, CRIM1, ITGA2, CDC25A, E2F7, CDCA4, TMEM100, KIF23, CPEB3, RS1, HOXA10, CLSPN, MKX, PTPRD, PHF19, NOTCH2, B4GALT1, GABARAPL1, JARID2,                                                               |
| hsa-mir-196b | HMGA2, NAP1L1, IGF2BP3                                                                                                                                                                                                                                                                |
| hsa-mir-200a | CCNE2, PTPRD, USP53, ELAVL2, H2AFZ, DEK, THRB                                                                                                                                                                                                                                         |
| hsa-mir-200b | GATA4, WASF3, PARD6B, LOX, DENND5B, PRRG4, ETV5, FSCN1                                                                                                                                                                                                                                |
| hsa-mir-204  | ARHGAP29, CDH2, HAS2, JARID2, ARAP2, CHD5                                                                                                                                                                                                                                             |
| hsa-mir-206  | PAX3, GJA1, STC2, ANXA2                                                                                                                                                                                                                                                               |
| hsa-mir-20a  | E2F1, CRIM1, STAT3, NETO2, DUSP2, ITGB8, EGR2, SMOC1, PARD6B, RRM2, TXNIP, KPNA2, CHAF1A, ANKRD33B, SALL3, PRRG1, ETV1, ZNF280B, ZBTB7A, ZBTB4, SACS, POLQ, KIF23, FAM102A, E2F2, DENND5B, ARAP2, CEP170, ATAD2, FOXQ1, HMGB3, NACC2, ELAVL2, PLS1, ENPP5, SAMD12, HAS2, KIF26B, NTN4 |
| hsa-mir-21   | RASGRP1, TIMP3, MSH2, TIAM1, CCL20, CPEB3, PBRM1, SKP2, OSR1, STAT3                                                                                                                                                                                                                   |
| hsa-mir-22   | TIAM1                                                                                                                                                                                                                                                                                 |
| hsa-mir-23a  | PPARGC1A, QSER1, FBN2, GJA1, TRIM63                                                                                                                                                                                                                                                   |
| hsa-mir-25   | KLF4, CCNE2, CHCHD10, PKDCC, ROBO1, BTG2, TOB1, MAP1B, SOX11, SLC12A5, HAND2, TRIM36, PAX9, LHFPL2, CPEB3, CHST1                                                                                                                                                                      |
| hsa-mir-27a  | THRB, FOXP4, SEMA6A, SLC7A11, PPARG, HOXA10, GATA2, PEG10, FAM84B, E2F7, DKK2                                                                                                                                                                                                         |
| hsa-mir-29a  | CD276, TET1, CPEB3, TRIM63, MYCN, NAV3, PXDN, KLF4, CCND2, LOX, IGF1, TFEB, SLC16A1, SGK1, FOS, DUSP2, CCNA2, ENPP2, ROBO1, AHR                                                                                                                                                       |
| hsa-mir-29c  | CD276, COL7A1, BACH2, MYCN, CCND2, LOX, SLC16A1, SGK1, FOS, DUSP2, CCNA2, ENPP2, KLF4                                                                                                                                                                                                 |
| hsa-mir-301a | MEOX2, CEP55, SMOC1, SALL3, EDN1, DLG5, ZBTB4, RBM20, CEP170, ENPP5, MB21D2, DEPDC1, RACGAP1, IRF1, JARID2                                                                                                                                                                            |
| hsa-mir-301b | CEP55, SMOC1, SALL3, EDN1, DLG5, ZBTB4, RBM20, CEP170, ENPP5, MB21D2, DEPDC1, RACGAP1, IRF1, JARID2, NR3C2                                                                                                                                                                            |
| hsa-mir-30a  | CPNE8, FOXD1, FOXG1, HIC2, ZBTB39, DBF4, CBX2, SOCS3, SOCS1, SIX4, CELSR3, PCDH10, MYBL2, LIN28B, LHFPL2, IP6K3, EPB41, NCAM1, CCNE2, SKP2, KLF9                                                                                                                                      |
| hsa-mir-30b  | CCNE2, SOCS1, CDCA7, HIC2, SERPINE1, SIX1, FOXG1, ZBTB39, DBF4, CBX2, SOCS3, SIX4, CELSR3, PCDH10, MYBL2, LIN28B, LHFPL2, IP6K3, EPB41, HOXA1                                                                                                                                         |

|             |                                                                                                                                                                                                                                                                                               |
|-------------|-----------------------------------------------------------------------------------------------------------------------------------------------------------------------------------------------------------------------------------------------------------------------------------------------|
| hsa-mir-33a | PIM3, DSC3, HMGA2, CPT1A                                                                                                                                                                                                                                                                      |
| hsa-mir-429 | WASF3, PARD6B, DENND5B, PRRG4, FSCN1                                                                                                                                                                                                                                                          |
| hsa-mir-454 | ZBTB4, CEP55, SMOC1, SALL3, EDN1, DLG5, RBM20, CEP170, ENPP5, MB21D2, DEPDC1, RACGAP1, IRF1, JARID2                                                                                                                                                                                           |
| hsa-mir-497 | WNT7A, CHEK1, CEP55, CCND2, CCNE1, PSAT1, HSPE1-MOB4, GABARAPL1, CBX2, CRIM1, ITGA2, CDC25A, E2F7, CDCA4, TMEM100, KIF23, CPEB3, JARID2, HOXA10, CLSPN, MKX, PTPRD, PHF19, NOTCH2, RS1                                                                                                        |
| hsa-mir-503 | CCND2, JARID2                                                                                                                                                                                                                                                                                 |
| hsa-mir-93  | E2F1, ITGB8, GPR137C, NACC2, IRF1, EGR2, PRRG1, SAMD12, OSR1, KLF9, MED12L, STAT3, KPNA2, ZBTB7A, ZBTB4, SMOC1, PARD6B, TXNIP, CHAF1A, ANKRD33B, SALL3, CEP170, ATAD2, NETO2, FOXQ1, HMGB3, DUSP2, ELAVL2, PLS1, ENPP5, HAS2, ZNF280B, SACS, POLQ, FAM102A, E2F2, DENND5B, ARAP2, RRM2, KIF23 |
| hsa-mir-96  | PRDM16, ALK, SLC1A1, GDNF                                                                                                                                                                                                                                                                     |

The 394 differently expressed miRNA-mRNA pairs were identified including 189 mRNAs and 33 miRNAs based on the three databases: Targetscan, miRTarBase and miRDB. Only the mRNAs predicted by all the above three databases were defined as the target mRNAs.

**Table S6 Multivariable Cox regression coefficient for each RNA with potential prognostic value and 4 vital clinical variables**

| RNA           | histologic classification (FAWT vs DAWT) | tumor stage (I+II vs III+IV) | age (>=5 vs <5) | gender (female vs male) | RNA (low vs high) |
|---------------|------------------------------------------|------------------------------|-----------------|-------------------------|-------------------|
| DBF4          | 0.371                                    | 1.337                        | 0.663           | 0.921                   | -0.215            |
| DEPDC1        | 0.391                                    | 1.401                        | 0.69            | 0.908                   | -0.13             |
| QSER1         | 0.383                                    | 1.411                        | 0.713           | 0.914                   | -0.094            |
| IGF2BP2       | 0.347                                    | 1.475                        | 0.612           | 0.975                   | -0.404            |
| NTN4          | 0.392                                    | 1.418                        | 0.759           | 0.929                   | -0.122            |
| FGF9          | 0.393                                    | 1.406                        | 0.718           | 0.913                   | -0.108            |
| CCNE1         | 0.393                                    | 1.432                        | 0.757           | 0.922                   | 0.121             |
| BCL6          | 0.411                                    | 1.45                         | 0.753           | 0.96                    | -0.209            |
| KLF9          | 0.379                                    | 1.518                        | 0.87            | 0.941                   | -0.408            |
| MYCN          | 0.35                                     | 1.42                         | 0.748           | 0.977                   | -0.29             |
| FOXP4         | 0.378                                    | 1.434                        | 0.743           | 0.918                   | 0.162             |
| OSR1          | 0.433                                    | 1.377                        | 0.747           | 0.909                   | 0.24              |
| CHEK1         | 0.372                                    | 1.431                        | 0.739           | 0.914                   | 0.247             |
| RP11-93B14.6  | 0.392                                    | 1.411                        | 0.719           | 1.004                   | 0.312             |
| CDCA4         | 0.404                                    | 1.411                        | 0.735           | 0.967                   | 0.285             |
| SAMD12        | 0.289                                    | 1.411                        | 0.661           | 0.88                    | -0.452            |
| ARC           | 0.383                                    | 1.414                        | 0.734           | 0.933                   | -0.025            |
| AC062017.1    | 0.42                                     | 1.407                        | 0.707           | 0.98                    | 0.498             |
| RP11-495P10.3 | 0.386                                    | 1.413                        | 0.718           | 0.927                   | 0.053             |

|               |       |       |       |       |        |
|---------------|-------|-------|-------|-------|--------|
| RP11-576D8.4  | 0.362 | 1.363 | 0.691 | 0.946 | -0.391 |
| LAMP5-AS1     | 0.456 | 1.342 | 0.846 | 0.862 | -0.516 |
| SHANK2-AS1    | 0.35  | 1.406 | 0.758 | 0.932 | 0.186  |
| AC135178.7    | 0.496 | 1.536 | 0.857 | 1.028 | 0.716  |
| RP1-101K10.6  | 0.392 | 1.411 | 0.726 | 0.929 | 0.067  |
| RP11-284F21.7 | 0.27  | 1.412 | 0.668 | 0.886 | -0.461 |
| AC114803.3    | 0.346 | 1.455 | 0.744 | 0.961 | -0.262 |
| AC013275.2    | 0.351 | 1.438 | 0.759 | 0.961 | -0.463 |
| RP4-569M23.2  | 0.393 | 1.412 | 0.756 | 0.951 | 0.23   |
| AC093702.1    | 0.594 | 1.406 | 0.818 | 0.93  | 0.704  |
| RP11-462B18.2 | 0.385 | 1.4   | 0.717 | 0.932 | 0.093  |
| SEMA3B-AS1    | 0.427 | 1.467 | 0.867 | 0.885 | -0.48  |
| AC016768.1    | 0.372 | 1.417 | 0.697 | 0.953 | -0.093 |
| LINC01553     | 0.369 | 1.432 | 0.709 | 0.91  | 0.264  |
| RP11-3B12.2   | 0.374 | 1.458 | 0.693 | 0.941 | -0.401 |
| RP11-495P10.5 | 0.386 | 1.409 | 0.697 | 0.938 | 0.208  |
| RP11-492E3.51 | 0.407 | 1.406 | 0.769 | 0.926 | -0.202 |
| RP11-768G7.2  | 0.477 | 1.501 | 0.756 | 0.913 | 0.502  |
| ATP1B3-AS1    | 0.414 | 1.386 | 0.71  | 0.939 | -0.21  |
| AC007009.1    | 0.38  | 1.459 | 0.652 | 0.961 | -0.371 |
| RP11-10L7.1   | 0.281 | 1.506 | 0.709 | 1.032 | 0.504  |
| CTD-2024I7.13 | 0.405 | 1.443 | 0.73  | 0.956 | -0.197 |
| RP11-834C11.8 | 0.38  | 1.412 | 0.724 | 0.989 | -0.299 |
| CTB-35F21.1   | 0.386 | 1.396 | 0.712 | 0.927 | 0.096  |
| BMPR1B-AS1    | 0.411 | 1.434 | 0.782 | 0.89  | -0.264 |
| LINC01332     | 0.355 | 1.434 | 0.801 | 0.948 | -0.239 |
| RP11-588L15.2 | 0.448 | 1.41  | 0.71  | 0.864 | -0.473 |
| RP11-648L3.2  | 0.389 | 1.453 | 0.733 | 0.93  | 0.206  |
| CTB-54I1.1    | 0.369 | 1.439 | 0.683 | 0.949 | -0.28  |
| RP11-430H10.3 | 0.518 | 1.438 | 0.739 | 0.961 | 0.332  |
| RP11-45A12.1  | 0.378 | 1.414 | 0.733 | 0.923 | -0.114 |
| RP11-428C19.4 | 0.338 | 1.446 | 0.725 | 0.947 | 0.241  |
| RP11-483L5.1  | 0.574 | 1.467 | 0.808 | 1.055 | 0.828  |
| DENND5B-AS1   | 0.372 | 1.392 | 0.723 | 0.932 | 0.177  |
| RP11-598F7.3  | 0.44  | 1.436 | 0.701 | 0.963 | 0.57   |
| TMPO-AS1      | 0.386 | 1.403 | 0.724 | 0.927 | 0.068  |
| RP11-290L1.5  | 0.317 | 1.454 | 0.745 | 0.932 | -0.335 |
| RP1-288H2.2   | 0.27  | 1.443 | 0.738 | 0.947 | -0.385 |
| RP11-122D10.1 | 0.391 | 1.413 | 0.75  | 0.929 | 0.074  |
| RP11-265N7.1  | 0.435 | 1.399 | 0.752 | 0.945 | 0.166  |
| RP11-499F3.1  | 0.379 | 1.407 | 0.718 | 0.912 | -0.07  |
| RP11-646E18.4 | 0.388 | 1.422 | 0.744 | 0.917 | 0.076  |
| RP11-800A3.4  | 0.383 | 1.409 | 0.725 | 0.923 | 0.027  |
| RP3-523K23.2  | 0.469 | 1.554 | 0.837 | 0.981 | -0.664 |

|              |       |       |       |       |        |
|--------------|-------|-------|-------|-------|--------|
| RP11-165M1.3 | 0.331 | 1.423 | 0.68  | 0.981 | -0.344 |
| hsa-mir-17   | 0.377 | 1.364 | 0.799 | 0.867 | 0.313  |
| hsa-mir-200a | 0.364 | 1.653 | 0.776 | 1.123 | -1.078 |
| hsa-mir-200b | 0.406 | 1.631 | 0.776 | 1.121 | -0.852 |
| hsa-mir-20a  | 0.326 | 1.374 | 0.87  | 0.786 | 0.53   |
| hsa-mir-21   | 0.418 | 1.46  | 0.769 | 0.928 | -0.15  |
| hsa-mir-429  | 0.435 | 1.817 | 0.782 | 1.163 | -1.099 |
| hsa-mir-93   | 0.41  | 1.424 | 0.845 | 0.875 | 0.292  |

---

The red color represents significant variables with P-value < 0.05.



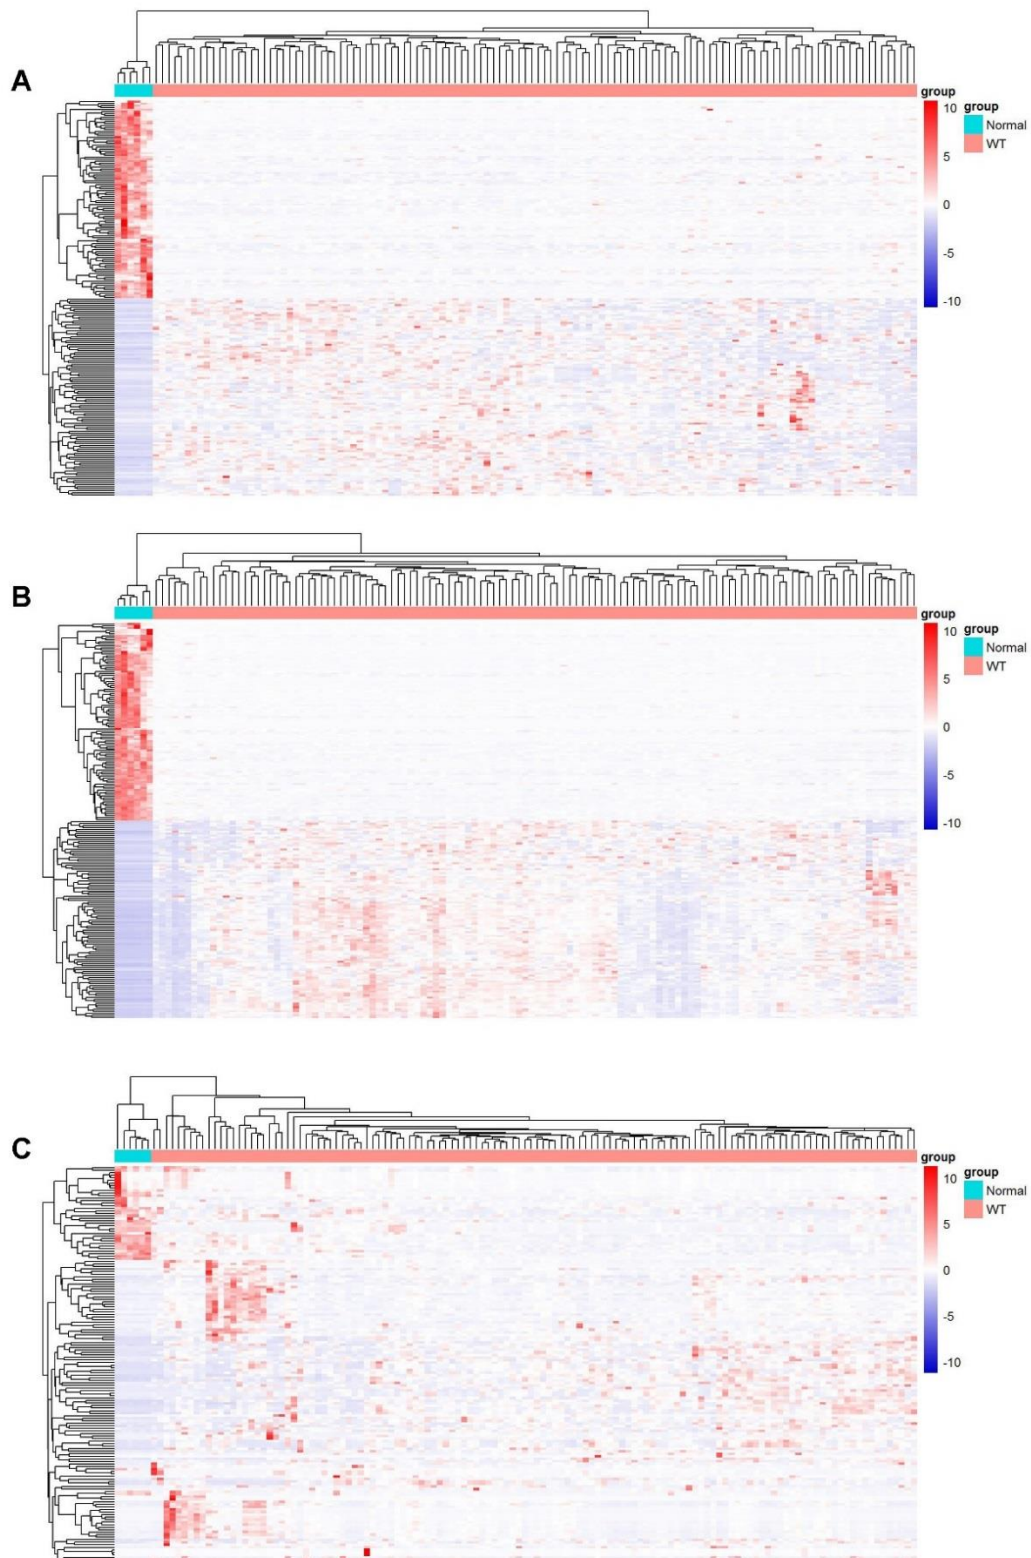

Figure S1. Unsupervised hierarchical clustering heatmaps for differentially expressed RNAs. A is the heatmap with top 100 upregulated and top 100 downregulated lncRNAs, B shows the top 100 upregulated and top 100 downregulated mRNAs and C represents all DE miRNAs including 116 up-regulated and 40 down-regulated miRNAs.
